# Supplementary material for: Chinese Consumers’ Heterogeneous Preferences for the Front-of-Package Labeling on Fresh Pork: A Choice Experiment Approach
Source: MDPI journal article supplement (doi:10.3390/foods11182929), 2022-09-19
Supplement: s1 [file s1]

## The questionnaire

### Section 1 Demographic characteristics

Q1-1 Your gender: A. Male B. Female

Q1-2 Your age: \_\_\_\_\_ years old

Q1-3 Are you Han Chinese people? A. Yes B. No

Q1-4 Your residence: A. Urban area B. Rural area

Q1-5 Your education level: A. Primary school or below B. Junior school C. Senior school D. Junior college or undergraduate E. Postgraduate or above

Q1-6 Your annual disposable income: \_\_\_\_\_ Chinese Yuan

Q1-7 There are: \_\_\_\_\_ permanent residents in your family

### Section 2 Test questions on cognition of fresh pork nutrition

Q2-1 What is the minimum fat content of pork that can be called fat pork?

A.10% B.20% C.30% D.40% E.50%

Q2-2 What is the maximum fat content of pork that can be called lean pork?

A.10% B.20% C.30% D.40% E.50%

Q2-3 Which of the following parts of pork has the lowest fat content?

A. Pork neck B. Griskin C. Streaky pork D. Elbow meat E. Pork rump

Q2-4 What percentage of saturated fatty acids is in pork fat?

A.25%-35% B. 35%-45% C.45%-55% D. 55%-65% E. 65%-75%

Q2-5 What is the maximum amount of pork we can eat in a day for a healthy diet?

A. 25 g B.50 g C.75 g D.100 g E.125 g

### Section 3 Trust in the FOP labeling applied to fresh pork

There is a nutrition labeling that uses a symbol or graphic to show the nutritional status of fresh pork, which is known as front of package (FOP) nutrition labeling. The United States, the Netherlands, Sweden, Singapore have applied FOP nutrition labeling to fresh pork. Consumers could know the nutritional value of fresh pork through the symbol, 0~3 stars and 1~100 scores shown in Table S1.

**Table S1.** The FOP labelling applied to fresh pork internationally

| FOP<br>nutrition<br>labeling<br>(one<br>example) |          |           |          |             |                         |                  |
|--------------------------------------------------|---------------------------------------------------------------------------------------------|----------------------------------------------------------------------------------------------|---------------------------------------------------------------------------------------------|-------------------------------------------------------------------------------------------------|--------------------------------------------------------------------------------------------------------------|-------------------------------------------------------------------------------------------------------|
|                                                  | Swedish<br>Keyhole symbol                                                                   | American<br>Heart-check mark                                                                 | Singapore<br>Healthier choice<br>symbol                                                     | Choices logo in<br>the Dutch                                                                    | American Guiding<br>stars labeling                                                                           | American NuVal<br>labeling                                                                            |
| Role                                             | Low saturated<br>fatty acid, low<br>sodium fresh pork<br>labelled with the<br>above keyhole | High overall<br>nutritional quality<br>of fresh pork<br>labelled with the<br>above red heart | Low saturated<br>fatty acid, low<br>sodium fresh pork<br>labelled with the<br>above pyramid | High overall<br>nutritional quality<br>of fresh pork<br>labelled with the<br>above tick graphic | Overall nutritional<br>quality of fresh pork<br>lablled with 0~3<br>stars. The more<br>stars, the higher the | Overall nutritional<br>quality of fresh<br>pork lablled with<br>1~100 scores. The<br>more scores, the |

|         |         |         |                             |                                        |
|---------|---------|---------|-----------------------------|----------------------------------------|
| graphic | graphic | graphic | overall nutritional quality | higher the overall nutritional quality |
|---------|---------|---------|-----------------------------|----------------------------------------|

Q3-1 Do you often pay attention to the nutritional value of fresh pork?

A. Yes B. No

Q3-2 If the FOP nutrition labeling similar to Table S1 was applied to fresh pork in China, would you trust the labeling information?

A. very much  
B. mostly  
C. occasionally  
D. rarely  
E. not at all

#### Section 4 The choice experiment for eliciting consumers' preference for the FOP labeling applied to fresh pork

Suppose that when you visit the fresh pork case in your supermarket during a given month you are presented with two choices of the front of package (FOP) labels on fresh pork (Option A and Option B). Label A and Label B have different attributes but we have described below for you. While many attributes vary from Label A to Label B. The following are descriptions of the attributes but may vary from Label A to Label B:

*Labeling information expression.* The FOP labeling shows nutritional information of fresh pork by one way.

*Labeling size.* The size of FOP labeling is expressed in percentages of the front area of the fresh pork package.

*Labeling color.* The FOP labeling is expressed a single color.

*Labeling price.* The price of FOP labeling is expressed in percentages of the average retail price of common fresh pork per 500 grams.

Consider each of the following eight boxes below as separate sets of choices. In each of the eight boxes please select the FOP labeling choice (Option A, Option B or Option C) that best matches your preferences:

| Box 1                                             | Option A                            | Option B                               | Option C                 |
|---------------------------------------------------|-------------------------------------|----------------------------------------|--------------------------|
| Labeling information expression                   | Digit                               | Character                              |                          |
| Labeling size                                     | 6% of the front area of the package | 25% of the front area of the package   | Neither                  |
| Labeling color                                    | Green                               | Blue                                   |                          |
| Labeling price                                    | 0 RMB                               | 10% of the price of pork per 500 grams |                          |
| <i>I would choose:</i> (Please mark only one box) | <input type="checkbox"/>            | <input type="checkbox"/>               | <input type="checkbox"/> |

| Box 2                                             | Option A                            | Option B                               | Option C                 |
|---------------------------------------------------|-------------------------------------|----------------------------------------|--------------------------|
| Labeling information expression                   | Character                           | Digit                                  |                          |
| Labeling size                                     | 6% of the front area of the package | 25% of the front area of the package   | Neither                  |
| Labeling color                                    | Blue                                | Green                                  |                          |
| Labeling price                                    | 0 RMB                               | 10% of the price of pork per 500 grams |                          |
| <i>I would choose:</i> (Please mark only one box) | <input type="checkbox"/>            | <input type="checkbox"/>               | <input type="checkbox"/> |

| Box 3                                             | Option A                             | Option B                               | Option C                 |
|---------------------------------------------------|--------------------------------------|----------------------------------------|--------------------------|
| Labeling information expression                   | Letter                               | Digit                                  |                          |
| Labeling size                                     | 25% of the front area of the package | 13% of the front area of the package   | Neither                  |
| Labeling color                                    | Green                                | Blue                                   |                          |
| Labeling price                                    | 0 RMB                                | 15% of the price of pork per 500 grams |                          |
| <i>I would choose:</i> (Please mark only one box) | <input type="checkbox"/>             | <input type="checkbox"/>               | <input type="checkbox"/> |

| Box 4                                             | Option A                             | Option B                               | Option C                 |
|---------------------------------------------------|--------------------------------------|----------------------------------------|--------------------------|
| Labeling information expression                   | Character                            | Digit                                  |                          |
| Labeling size                                     | 13% of the front area of the package | 6% of the front area of the package    | Neither                  |
| Labeling color                                    | Green                                | Blue                                   |                          |
| Labeling price                                    | 0 RMB                                | 10% of the price of pork per 500 grams |                          |
| <i>I would choose:</i> (Please mark only one box) | <input type="checkbox"/>             | <input type="checkbox"/>               | <input type="checkbox"/> |

| Box 5                           | Option A                 | Option B                 | Option C |
|---------------------------------|--------------------------|--------------------------|----------|
| Labeling information expression | Graphic                  | Letter                   |          |
| Labeling size                   | 13% of the front area of | 25% of the front area of | Neither  |

|                                                   |                                        |                                        |                          |
|---------------------------------------------------|----------------------------------------|----------------------------------------|--------------------------|
|                                                   | the package                            | the package                            |                          |
| Labeling color                                    | Blue                                   | Green                                  |                          |
| Labeling price                                    | 10% of the price of pork per 500 grams | 15% of the price of pork per 500 grams |                          |
| <i>I would choose:</i> (Please mark only one box) | <input type="checkbox"/>               | <input type="checkbox"/>               | <input type="checkbox"/> |

|                                                   |                                        |                                        |                          |
|---------------------------------------------------|----------------------------------------|----------------------------------------|--------------------------|
| Box 6                                             | Option A                               | Option B                               | Option C                 |
| Labeling information expression                   | Graphic                                | Character                              |                          |
| Labeling size                                     | 13% of the front area of the package   | 6% of the front area of the package    | Neither                  |
| Labeling color                                    | Blue                                   | Green                                  |                          |
| Labeling price                                    | 15% of the price of pork per 500 grams | 10% of the price of pork per 500 grams |                          |
| <i>I would choose:</i> (Please mark only one box) | <input type="checkbox"/>               | <input type="checkbox"/>               | <input type="checkbox"/> |

|                                                   |                                        |                                      |                          |
|---------------------------------------------------|----------------------------------------|--------------------------------------|--------------------------|
| Box 7                                             | Option A                               | Option B                             | Option C                 |
| Labeling information expression                   | Letter                                 | Digit                                |                          |
| Labeling size                                     | 13% of the front area of the package   | 25% of the front area of the package | Neither                  |
| Labeling color                                    | Green                                  | Blue                                 |                          |
| Labeling price                                    | 10% of the price of pork per 500 grams | 0 RMB                                |                          |
| <i>I would choose:</i> (Please mark only one box) | <input type="checkbox"/>               | <input type="checkbox"/>             | <input type="checkbox"/> |

|                                                   |                                        |                                      |                          |
|---------------------------------------------------|----------------------------------------|--------------------------------------|--------------------------|
| Box 8                                             | Option A                               | Option B                             | Option C                 |
| Labeling information expression                   | Graphic                                | Letter                               |                          |
| Labeling size                                     | 6% of the front area of the package    | 13% of the front area of the package | Neither                  |
| Labeling color                                    | Green                                  | Blue                                 |                          |
| Labeling price                                    | 15% of the price of pork per 500 grams | 0 RMB                                |                          |
| <i>I would choose:</i> (Please mark only one box) | <input type="checkbox"/>               | <input type="checkbox"/>             | <input type="checkbox"/> |
